# Supplementary material
Source: MDPI journal article supplement (https://www.mdpi.com/2077-0472/14/5/661)
Supplement: s1 [file s1]

**Supplemental Table S1.** Primers designed for qRT-PCR analysis

| Gene                    | Forward primers (5'-3')  | Reverse primers (5'-3')  |
|-------------------------|--------------------------|--------------------------|
| <i>MsG0180001827.01</i> | AACCTGGATTTTCGCGGTGAT    | TACACCCAACCTCCTCCCCT     |
| <i>MsG0180005519.01</i> | TAGGGCAGTGGTAAACAGCG     | CAGGGTAGATCCTTGGGTTGT    |
| <i>MsG0180005358.01</i> | GAAAGCCACCAGAGAAGTGC     | CCCACTCAAGTCCTTCTCCC     |
| <i>MsG0780040428.01</i> | CCGGTAAAATGGCCGAAAGC     | GAGCGGGGTTAGAGTGGATG     |
| <i>MsG0780036812.01</i> | TGCCATCATCGGTAACAACCA    | TGGGACGTGCGAAAAGAGTT     |
| <i>MsG0480020076.01</i> | CAAGGTATGGTTTGCACCGC     | GAGATCCTCCGATACCCCCA     |
| <i>MsG0480018569.01</i> | CTGTGACCAGCACCATTCCT     | CTTGTGGTTTGTGGAAGCGG     |
| <i>MsG0180004772.01</i> | CAGCACCACCGTTGAATTGG     | GGGCCCATGTAAAGGGCTTA     |
| <i>MsG0180004541.01</i> | CCGCTGAGGTTCTTCCTGTT     | ACCAACCAATCGACGACACA     |
| <i>MsG0880047697.01</i> | TTCTTTTTGCGCCACCTTCC     | TCAGCCAGGTTCTCAAGTTCC    |
| <i>Ms-ACTIN2</i>        | CAAAAGATGGCAGATGCTGAGGAT | CATGACACCAGTATGACGAGGTCG |
